# Supplementary material
Source: MDPI journal article supplement (https://www.mdpi.com/2673-6772/3/1/4)
Supplement: s1 [file s1]

**Supplementary Table S1.** Proteins with similarity between fish and parasites. E-values were obtained from the alignment of the sequences of *R. viridisi* against sequences from different taxa using the NCBI database.

| <b>Protein ID</b>   | <b>Teleostei<br/>E-value</b>                                    | <b>Lophotrochozoa<br/>E-value</b>              | <b>Platyhelminthes<br/>E-value</b>      |
|---------------------|-----------------------------------------------------------------|------------------------------------------------|-----------------------------------------|
| DN106_c0_g1_i4.p14  | 2e-21 peptidase inhibitor                                       | 3e-23 protein BOX15                            | 1e-23 protein BOX15                     |
| DN5221_c0_g1_i2.p1  | 3e-15 C-type lectin                                             | 5e-14 lectin/receptor                          | 4e-07 protein BOX15                     |
| DN12056_c0_g1_i1.p1 | 4e-07 protocadherin                                             | 3e-08 protocadherin                            | 1e-08 protocadherin                     |
| DN5544_c0_g1_i11.p6 | 3e-09 C-type lectin                                             | 8e-07 C-type lectin                            | 3e-07 C-type lectin                     |
| DN4578_c0_g2_i10.p1 | 3e-83 cathepsin                                                 | 2e-87 cathepsin                                | 2e-87 cathepsin                         |
| DN51_c2_g1_i1.p1    | 6e-29 disintegrin and metalloproteinase domain                  | 4e-25 disintegrin and metalloproteinase domain | 2e-24 BOX15                             |
| DN59_c0_g2_i1.p4    | 1e-40 diphosphomevalonate decarboxylase                         | 7e-48 diphosphomevalonate decarboxylase        | 1e-40 diphosphomevalonate decarboxylase |
| DN700_c0_g1_i10.p1  | 2e-09 macrophage mannose receptor                               | 2e-09 macrophage mannose receptor              | 8e-06 C-type lectin                     |
| DN70202_c0_g1_i1.p1 | 2e-104 cathepsin                                                | 2e-104 cathepsin                               | 7e-105 BOX15/cathepsin                  |
| DN7233_c0_g1_i15.p5 | 5e-12 nuclear pore complex protein                              | 2e-10 BOX15                                    | 8e-11 BOX15                             |
| DN75_c0_g1_i1.p2    | 5e-04 serine protease                                           | 2e-06 chymotrypsinogen                         | 0.018 BOX15                             |
| DN890_c0_g1_i12.p4  | 6e-07 stromal interaction molecule                              | 7e-08 stromal interaction molecule             | 7e-08 BOX15                             |
| DN1020_c0_g1_i6.p4  | 3e-31 C-type lectin                                             | 4e-41 C-type lectin                            | 5e-39 C-type lectin                     |
| DN1169_c1_g1_i8.p1  | 3e-09 serine protease                                           | 8e-10 chymotrypsin-like elastase               | 4e-08 peptidase/serine protease         |
| DN1300_c0_g1_i5.p2  | 3e-22 secretory phospholipase A2                                | 4e-26 phospholipase A2                         | 2e-21 BOX15/phospholipase A2            |
| DN1349_c0_g1_i9.p4  | 1e-20 endoplasmic reticulum oxidoreductin 1 (ERO1)-like protein | 1e-22 ERO1-like protein                        | 8e-19 ERO1-like protein                 |
| DN13993_c0_g1_i3.p1 | 8e-11 C-type mannose receptor                                   | 6e-10 galactose-specific lectin                | 7e-09 lectin                            |
| DN5361_c0_g1_i3.p1  | 4e-37 frizzled-8-like                                           | 2e-40 frizzled-8                               | 8e-41 frizzled-8                        |

**Supplementary Table S2.** Possible multifunctional proteins found in predicted ES proteins of *R. viridisi*.

| Protein ID           | Pfam ID    | Description                                                                                                                        | Reported in MultitaskProtDB              |
|----------------------|------------|------------------------------------------------------------------------------------------------------------------------------------|------------------------------------------|
| DN116_c0_g1_i15.p1   | PF02225.23 | Protease A domain                                                                                                                  |                                          |
|                      | PF01532.21 | Glycosyl hydrolase family 47                                                                                                       |                                          |
| DN1289_c0_g1_i2.p1   | PF04777.14 | Erv1 / Alr family (mitochondrial sulfhydryl oxidase)                                                                               | Thioredoxin ( <i>Escherichia coli</i> )  |
|                      | PF00085.21 | Thioredoxin (reduction of other proteins by cysteine thiol-disulfide exchange)                                                     |                                          |
| DN2691_c0_g1_i1.p1   | PF06468.14 | Spondin_N (involved in patterning axonal growth trajectory)                                                                        | Thrombospondin 1 ( <i>Homo sapiens</i> ) |
|                      | PF00090.20 | Thrombospondin type@2 (Adhesive glycoprotein that mediates cell-to-cell and cell-to-matrix interactions. Binds heparin.)           |                                          |
|                      | PF00014.24 | Kunitz inhibitor domain (protease inhibitor)                                                                                       |                                          |
| DN2999_c0_g1_i1.p1   | PF01549.25 | ShK domain-like (Stichodactyla toxin that blocks potassium channels)                                                               |                                          |
|                      | PF00094.26 | von Willebrand factor type D domain (growth regulator/binding domain)                                                              |                                          |
| DN30683_c0_g2_i14.p2 | PF14543.7  | Xylanase inhibitor N-terminal                                                                                                      |                                          |
|                      | PF00026.24 | Eukaryotic aspartyl protease                                                                                                       |                                          |
| DN466_c0_g1_i12.p1   | PF01186.18 | Lysyl oxidase                                                                                                                      |                                          |
|                      | PF00530.19 | Scavenger receptor cysteine-rich domain (endocytic receptors that mediate non-opsonic phagocytosis in response to foreign ligands) |                                          |

**Supplementary Table S3.** Adhesion proteins identified in *R. viridisi*.

| <b>Protein ID</b>     | <b>Uniprot ID</b> | <b>Annotation</b>                                                     |
|-----------------------|-------------------|-----------------------------------------------------------------------|
| DN100674_c1_g2_i1.p1  | Q5RJH3            | Cadherin-12                                                           |
| *DN919_c0_g1_i11.p6   | Q9Y5E4            | Protocadherin beta-5                                                  |
| DN76720_c0_g1_i2.p5   | Q96JQ0            | Protocadherin-16                                                      |
| *DN2904_c1_g1_i10.p1  | Q96JQ0            | Protocadherin-16                                                      |
| *DN3831_c0_g1_i12.p2  | Q9Y5G1            | Protocadherin gamma-B3                                                |
| *DN76720_c0_g1_i1.p1  | Q9Y5F6            | Protocadherin gamma-C5                                                |
| *DN76720_c0_g1_i1.p2  | P58365            | Cadherin-23                                                           |
| *DN46_c0_g1_i1.p1     | Q91Y11            | Protocadherin alpha-9                                                 |
| *DN1162_c0_g1_i11.p1  | Q08174            | Protocadherin-1                                                       |
| *DN3858_c0_g2_i1.p1   | Q08174            | Protocadherin-1                                                       |
| *DN3291_c0_g2_i1.p1   | Q2PZL6            | Protocadherin Fat 4                                                   |
| *DN12056_c0_g1_i1.p1  | Q9Y5G0            | Protocadherin gamma-B5                                                |
| *DN1190_c0_g1_i3.p1   | Q9Y5G8            | Protocadherin gamma-A5                                                |
| DN522_c1_g1_i6.p1     | Q6WYY1            | Protocadherin-11 X-linked                                             |
| DN7461_c0_g3_i2.p1    | Q5DRF1            | Protocadherin alpha-13                                                |
| DN1457_c0_g1_i1.p1    | Q6KEQ9            | Protocadherin-11 X-linked                                             |
| DN3273_c0_g2_i1.p1    | Q5DRC1            | Protocadherin gamma-A10                                               |
| DN25713_c0_g1_i5.p4   | Q9H251            | Cadherin-23                                                           |
| DN134_c0_g1_i1.p2     | A5Z1X6            | Integrin beta-1                                                       |
| *DN1069_c0_g1_i11.p1  | P05107            | Integrin beta-2                                                       |
| *DN2351_c0_g1_i1.p1   | Q06274            | Integrin alpha-5                                                      |
| DN20_c0_g1_i2.p1      | P33730            | E-selectin                                                            |
| **DN2061_c0_g1_i12.p2 | Q18823            | Laminin-like protein lam-2                                            |
| DN3022_c0_g1_i1.p1    | Q29058            | Galectin-4                                                            |
| *DN7800_c0_g1_i1.p1   | Q24292            | Protein dachsous/ protocadherin-16/23                                 |
| * DN602_c1_g1_i1.p1   | Q9VW71            | Fat-like cadherin-related tumor suppressor homolog/ protocadherin Fat |
| * DN191_c0_g1_i4.p2   | O89026            | Roundabout homolog 1                                                  |
| * DN6333_c0_g4_i2.p1  | G5EBF1            | Protein sax-3                                                         |
| * DN721_c0_g1_i1.p1   | Q9HCK4            | Roundabout homolog 2                                                  |
| **DN2063_c0_g1_i13.p1 | Q9UQP3            | Tenascin-N                                                            |
| **DN557_c0_g1_i3.p1   | P08120            | Collagen alpha-1(IV) chain                                            |
| **DN725_c0_g1_i1.p1   | P02466            | Collagen alpha-2(I) chain                                             |
| **DN725_c0_g1_i2.p1   | P02466            | Collagen alpha-2(I) chain                                             |
| **DN1296_c0_g1_i5.p1  | P02466            | Collagen alpha-2(I) chain                                             |

\*KEGG BRITE, object “cell adhesion molecules” [ko04515]; \*\*KEGG “focal adhesion” [PATH:ko04510]

**Supplementary Table S4.** Families of carbohydrate-active enzymes (CAZymes) in predicted ES proteins of *R. viridisi*.

| Protein ID          | HMMER E-value | Coverage | HMM Profile                                                                                                                                                                             |
|---------------------|---------------|----------|-----------------------------------------------------------------------------------------------------------------------------------------------------------------------------------------|
| DN116_c0_g1_i15.p1  | 3.2e-138      | 0.99     | GH47: Glycoside Hydrolase Family 47 (Activity: $\alpha$ -mannosidase (EC 3.2.1.113))                                                                                                    |
| DN1423_c0_g1_i10.p2 | 7.3e-61       | 0.63     | GH5_27: Glycoside Hydrolase Family 5 / Subf 27 (Activity: $\beta$ -glucosidase (EC 3.2.1.21); $\beta$ -mannosidase (EC 3.2.1.25))                                                       |
| DN1977_c0_g1_i14.p1 | 1.1e-154      | 0.99     | GH31: Glycoside Hydrolase Family 31 (Activity: $\alpha$ -glucosidase (EC 3.2.1.20); $\alpha$ -galactosidase (EC 3.2.1.22); $\alpha$ -mannosidase (EC 3.2.1.24))                         |
| DN2542_c2_g1_i1.p1  | 1.6e-89       | 0.97     | GH20: Glycoside Hydrolase Family 20 (Activity: $\beta$ -hexosaminidase (EC 3.2.1.52); $\beta$ -1,6-N-acetylglucosaminidase (EC 3.2.1.-))                                                |
| DN3756_c0_g1_i1.p1  | 5.8e-39       | 0.98     | GT31: Glycosyl Transferase Family 31 (Activity: chondroitin $\beta$ -1,3-glucuronyltransferase (EC 2.4.1.226); chondroitin $\beta$ -1,4-N-acetylgalactosaminyltransferase (EC 2.4.1.-)) |
| DN502_c0_g1_i1.p5   | 6.8e-38       | 0.98     | GT31                                                                                                                                                                                    |
| DN6559_c0_g1_i2.p1  | 4.8e-21       | 0.73     | GT4: GlycosylTransferase Family 4 (Activity: $\alpha$ -glucosyltransferase (EC 2.4.1.52))                                                                                               |
| DN716_c0_g2_i12.p1  | 2.5e-129      | 0.99     | GH47                                                                                                                                                                                    |
| DN834_c0_g1_i18.p2  | 1.6e-47       | 0.62     | GT27: GlycosylTransferase Family 27 (Activity: polypeptide $\alpha$ -N-acetylgalactosaminyltransferase (EC 2.4.1.41))                                                                   |
| DN151_c2_g1_i1.p2   | DIAMOND       |          | GT0                                                                                                                                                                                     |
| DN3825_c0_g1_i5.p1  | Hotpep        |          | PL0                                                                                                                                                                                     |
| DN725_c0_g1_i2.p1   | Hotpep        |          | PL0                                                                                                                                                                                     |

GH: Glycoside Hydrolase, GT: Glycosyl Transferase, PL: Polysaccharide Lyase

**Supplementary Table S5.** Most antigenic ES proteins from *R. viridis* (VaxiJen score > 0.9).

| Protein ID           | Annotation                                                       | Score  |
|----------------------|------------------------------------------------------------------|--------|
| DN725_c0_g1_i1.p1    | Collagen alpha-2(I) chain                                        | 1.3983 |
| DN18884_c0_g6_i2.p1  | Unknown nigellin-1.1                                             | 1.3867 |
| DN2184_c0_g1_i6.p6   | Unknown fkbp-type<br>peptidyl-prolyl cis-trans<br>isomerase slyd | 1.3846 |
| DN725_c0_g1_i2.p1    | Collagen alpha-2(I) chain                                        | 1.3310 |
| DN146924_c0_g3_i1.p1 | Unknown SH3-like barrel                                          | 1.2806 |
| DN9007_c0_g1_i4.p2   | Unknown protein phosphatase<br>1 regulatory subunit 3a           | 1.2422 |
| DN8473_c0_g5_i3.p1   | Unknown Ribosomal protein<br>L14e                                | 1.2028 |
| DN1296_c0_g1_i5.p1   | GTPase NRas                                                      | 1.1934 |
| DN557_c0_g1_i3.p1    | Collagen alpha-2(IV) chain<br>(Nematoda)                         | 1.1569 |
| DN93160_c0_g2_i1.p1  | Unknown beta-Grasp<br>(ubiquitin-like)                           | 1.1100 |
| DN102334_c1_g2_i1.p1 | Unknown PA1123-like                                              | 1.1017 |
| DN28732_c0_g3_i1.p1  | Unknown Flavodoxin-like                                          | 1.0883 |
| DN19332_c0_g1_i7.p1  | Unknown patellamide protein                                      | 1.0872 |
| DN49560_c0_g1_i1.p1  | Beta-1,4-galactosyltransferase<br>2                              | 1.0820 |
| DN8509_c0_g1_i3.p1   | unknown                                                          | 1.0786 |
| DN33919_c0_g3_i1.p1  | unknown                                                          | 1.0510 |
| DN98968_c0_g3_i1.p1  | unknown                                                          | 1.0417 |
| DN1329_c1_g1_i12.p5  | Inactive histone-lysine N-<br>methyltransferase 2E               | 1.0151 |
| DN30584_c0_g1_i1.p1  | unknown                                                          | 1.0057 |
| DN11034_c2_g2_i1.p1  | unknown                                                          | 1.0029 |
| DN12500_c1_g2_i1.p1  | unknown                                                          | 1.0007 |
| DN46661_c0_g1_i1.p1  | unknown                                                          | 0.9913 |
| DN18130_c1_g1_i1.p1  | unknown                                                          | 0.9897 |
| DN90688_c0_g3_i1.p2  | unknown                                                          | 0.9897 |
| DN75293_c0_g1_i1.p1  | unknown                                                          | 0.9874 |
| DN69511_c0_g1_i1.p1  | unknown                                                          | 0.9873 |
| DN17841_c0_g1_i1.p2  | unknown                                                          | 0.9814 |
| DN111655_c0_g4_i1.p1 | unknown                                                          | 0.9658 |
| DN180090_c0_g1_i1.p1 | unknown                                                          | 0.9604 |
| DN121379_c0_g3_i1.p1 | unknown                                                          | 0.9571 |
| DN1001_c0_g1_i1.p4   | Transcription factor 12                                          | 0.9432 |
| DN15568_c3_g2_i1.p1  | unknown                                                          | 0.9359 |

|                      |         |        |
|----------------------|---------|--------|
| DN18483_c0_g4_i3.p1  | unknown | 0.9352 |
| DN16250_c1_g5_i1.p1  | unknown | 0.9179 |
| DN140269_c1_g1_i2.p1 | unknown | 0.9158 |
| DN1236_c1_g1_i10.p3  | unknown | 0.9147 |
| DN15610_c0_g2_i1.p1  | unknown | 0.9105 |
| DN5197_c0_g2_i3.p3   | unknown | 0.9075 |
| DN29218_c0_g1_i1.p1  | unknown | 0.9035 |
| DN51918_c0_g1_i1.p1  | unknown | 0.9025 |
| DN7673_c0_g3_i1.p1   | unknown | 0.9025 |
| DN98683_c0_g1_i1.p1  | unknown | 0.9017 |
| DN1882_c0_g1_i10.p1  | unknown | 0.9006 |
| DN43568_c0_g3_i1.p1  | unknown | 0.9000 |
